# Supplementary material
Source: Research Square preprint supplement (doi:10.21203/rs.3.rs-9277447/v1)
Supplement: Supplementary file 1 [file 95cbb8d2e89b3f4baade274f.docx]

**Semi-structured interview guide and its targeted constructs**

| **Interview Question** | **Targeted Constructs** |
| --- | --- |
| (1) Which experiences or stages left the deepest impression on you? | • Salient events/ stages • Illness perception • Subjective experience |
| (2)During the stages of diagnosis/ hospitalization/treatment/ rehabilitation, what specific difficulties or challenges did you encounter? | • Stage-specific stressors • Disease-related burden • Unmet needs |
| (3)Throughout the entire course of illness and recovery, which key events or turning points significantly impacted your health management? How specifically? | • Critical incidents/ turning points • Health management behavior • Causal attribution of change |
| (4)At different stages of your illness, who played an important role in your health management? | • Social support network • Role identification of supporters |
| (5)What kind of support did they respectively provide? Facing the illness, how did your emotions and thoughts evolve? | • Type of support (emotional/ informational/ practical) • Emotional trajectory • Psychological adaptation • Self-perception change |
